# Supplementary material
Source: PubMed Central journal article supplement (PMC2922537)
Supplement: 1006756107_sapp.pdf [file 1006756107_sapp.pdf]

## Supporting Information

### Material and Methods

**Sequence Data.** We retrieved the full complement of globin genes from the genome sequences of nine vertebrate taxa, including three teleost fish (medaka, *Oryzias latipes*; pufferfish, *Tetraodon nigroviridis*; and zebrafish, *Danio rerio*), one amphibian (western clawed frog, *Xenopus tropicalis*), one squamate reptile (green anole lizard, *Anolis carolinensis*), two birds (chicken, *Gallus gallus*; and zebra finch, *Taeniopygia guttata*), and two mammals (human, *Homo sapiens*; and platypus, *Ornithorhynchus anatinus*). The complete globin gene repertoire of each species was obtained by means of bioinformatic searches in the Genbank or Ensembl (release 55) databases. We broadened our phylogenetic coverage by adding globin sequences derived from mRNA or protein records from representative cartilaginous fish (class Chondrichthyes), the most basal lineage of extant gnathostomes, and from cyclostomes, the sister group to gnathostome vertebrates. In the case of cartilaginous fish, we obtained  $\alpha$ - and  $\beta$ -Hb sequences from the red stingray (*Dasyatis akajei*) and gummy houndshark (*Mustelus antarcticus*), as well as Mb sequences from the latter species and the Port Jackson shark (*Heterodontus portusjacksoni*). In the case of cyclostomes, we included 12 sequences of functional Hbs from three representatives of subclasses Myxini and Hyperoartia: Five paralogous sequences from the sea lamprey (*Petromyzon marinus*, Hyperoartia), three from the Arctic lamprey (*Lethenteron japonicum*, Hyperoartia), and four from the hagfish (*Myxine glutinosa*, Myxini). We did not identify any previously undescribed globin genes in the Ensembl pre-release assembly of the sea lamprey genome. In addition, we included the previously reported globins from the sea squirt, *Ciona intestinalis* (1).

SI Table 1.

Sequences used in this study with the corresponding accession numbers.

| Sequence Name     | Accession number    | Source  | Sequence Name         | Accession number   | Source  |
|-------------------|---------------------|---------|-----------------------|--------------------|---------|
| Anole lizard Cygb | ENSACAG00000008394* | Ensembl | Platypus GbY          | AC203513           | GenBank |
| Anole lizard GbY  | AAWZ01045931*       | Ensembl | Platypus Hba          | AC203513           | GenBank |
| Anole lizard Hba  | ENSACAG00000016421  | Ensembl | Platypus Hbb          | AC190020           | GenBank |
| Anole lizard Hbb  | ENSACAG00000012173  | Ensembl | Platypus Hbw          | AC203513           | GenBank |
| Anole lizard Mb   | ENSACAG00000016595  | Ensembl | Platypus Mb           | XM_001513063       | GenBank |
| Chicken Cygb      | NM_001008789        | GenBank | Platypus Ngb          | XP_001508417       | GenBank |
| Chicken GbE       | NM_001008786        | GenBank | Port Jackson shark Mb | P02206             | GenBank |
| Chicken Hba       | NM_001004376        | GenBank | Pufferfish Cygb-1     | AJ635230           | GenBank |
| Chicken Hbb       | NM_001081704        | GenBank | Pufferfish Cygb-2     | AJ635231           | GenBank |
| Chicken Mb        | XM_416292           | GenBank | Pufferfish GbX        | CAG25725           | GenBank |
| Frog Cygb         | NM_001006869        | GenBank | Pufferfish Hba        | ENSTNIG00000018576 | Ensembl |
| Frog GbX          | NP_001011196        | GenBank | Pufferfish Hbb        | ENSTNIG00000012913 | Ensembl |
| Frog GbY          | BC158411            | GenBank | Pufferfish Mb         | ENSTNIG00000005518 | Ensembl |
| Frog Hba          | NM_203529           | GenBank | Pufferfish Ngb        | CAC59974           | GenBank |
| Frog Hbb          | NM_203528           | GenBank | Sea lamprey Hb PMII   | AF248645           | GenBank |
| Frog Ngb          | ENSXETG00000027106  | Ensembl | Sea lamprey Hb1a      | P09967             | GenBank |
| Hagfish Hb1       | AF156936            | GenBank | Sea lamprey Hb1b      | P21197             | GenBank |
| Hagfish Hb2       | AF157494            | GenBank | Sea lamprey Hb2       | Q9I9I3             | GenBank |
| Hagfish Hb3       | AF184047            | GenBank | Sea lamprey Hb3       | P09968             | GenBank |
| Hagfish Hb4       | AF184239            | GenBank | Sea lamprey Hb5       | P02208             | GenBank |
| Houndshark Hba    | BAA75399            | GenBank | Sea squirt Glb1       | CAD68145           | GenBank |
| Houndshark Hbb    | BAA75400            | GenBank | Sea squirt Glb2       | CAD68146           | GenBank |
| Houndshark Mb     | P14399              | GenBank | Sea squirt Glb3       | CAD68147           | GenBank |
| Human Cygb        | NM_134268           | GenBank | Sea squirt Glb4       | CAD89600           | GenBank |
| Human Hba         | NM_000558           | GenBank | Stingray Hba          | BAA75249           | GenBank |
| Human Hbb         | NM_000518           | GenBank | Stingray Hbb          | BAA75250           | GenBank |
| Human Mb          | NG_007075           | GenBank | Zebra finch Cygb      | XM_002195407       | GenBank |
| Human Ngb         | NP_067080           | GenBank | Zebra finch GbE       | XM_002196350       | GenBank |
| Lethenteron Hb 1  | AB294235            | GenBank | Zebra finch Hba       | XM_002196096       | GenBank |
| Lethenteron Hb 2  | AB294236            | GenBank | Zebra finch Hbb       | XM_002190485       | GenBank |
| Lethenteron Hb 4  | AB294237            | GenBank | Zebra finch Mb        | XM_002199380       | GenBank |
| Medaka Cygb-1     | NM_001104767        | GenBank | Zebrafish Cygb1       | NM_152952          | GenBank |
| Medaka Cygb-2     | NM_001104768        | GenBank | Zebrafish Cygb2       | NM_001024224       | GenBank |
| Medaka GbX        | ENSORLG00000017054  | Ensembl | Zebrafish GbX         | CAG25723           | GenBank |
| Medaka Hba        | ENSORLG00000005267  | Ensembl | Zebrafish Hba         | NM_131257          | GenBank |
| Medaka Hbb        | ENSORLG00000003020  | Ensembl | Zebrafish Hbb         | NM_131020          | GenBank |
| Medaka Mb         | ENSORLG00000004130  | Ensembl | Zebrafish Mb          | NM_200586          | GenBank |
| Medaka Ngb        | ENSORLT00000020359  | Ensembl | Zebrafish Ngb         | NP_571928          | GenBank |

\* These sequences were re-annotated manually.

## Results

**Sensitivity analysis.** Because changes in sequence alignment and substitution model are known to influence the results of phylogenetic analyses (2, 3), we explored sensitivity of our results to variation in alignment method, substitution model, and choice of outgroup. We aligned sequences with 10 alternative methods: Dialign (4), Kalign2 (5), the E-INS-i, G-INS-i, and L-INS-i strategies from Mafft v6.17 (6), Muscle v3.5 (7), Prank (8), Probalign (9), Probcons (10), and PROMALS3d (11). For each alignment we performed maximum likelihood searches under the JTT (12), LG (13), and mixed models of amino acid substitution and Bayesian analyses under the JTT (12), and mixed models of amino acid substitution. Maximum likelihood searches were implemented in Treefinder version October 2008 (14), and support for the nodes was evaluated with 1,000 bootstrap pseudoreplicates. Bayesian analyses were conducted using MrBayes version 3.1.2 (15), setting two independent runs of four simultaneous chains for 10,000,000 generations, sampling every 2,500 generations, and using default priors. Once convergence was verified, support for the nodes and parameter estimates were derived from a majority rule consensus of the last 2,500 trees. In maximum likelihood we used constrained searches to compare the likelihood scores of the ‘single co-option’ hypothesis (Fig. 2A, SI Fig 1A), the ‘parallel co-option or single co-option/secondary loss’ hypothesis (Fig. 2B, SI Fig 1B), and the ‘convergent co-option’ hypothesis (Fig. 2C, SI Fig 1C). Finally, we added vertebrate Globin X sequences and *Ciona* globin sequences to the alignment as additional outgroup sequences. A data file containing the complete set of sequence alignments is provided in the Supporting Information online.

SI Table 2. Results of the sensitivity analysis. Maximum likelihood scores of the best unconstrained tree, and the three competing hypotheses of globin gene family evolution, plus support for the node joining cyclostome hemoglobins with gnathostome cytoglobin. This first set of analyses included all the vertebrate-specific globins, plus six vertebrate neuroglobin sequences as outgroup sequences.

Data: vertebrate-specific globins + Neuroglobin

| model = JTT   | Likelihood scores |           |                    |                                                         | Support for the node joining cyclostome Hbs and cytoglobin |       |
|---------------|-------------------|-----------|--------------------|---------------------------------------------------------|------------------------------------------------------------|-------|
|               | Alignment         | best tree | 'single co-option' | 'parallel co-option or single co-option/secondary loss' | 'convergent co-option'                                     | ML bs |
| dialign       | -13480.4          | -13491.6  | -13491.3           | -13481.1                                                | 63%                                                        | 1.00  |
| kalign        | -13354.1          | -13366.1  | -13361.7           | -13354.1                                                | 58%                                                        | 1.00  |
| mafft_einsi   | -13351.2          | -13361.6  | -13361.0           | -13351.2                                                | 65%                                                        | 1.00  |
| mafft_ginsi   | -13325.5          | -13332.5  | -13331.0           | -13322.7                                                | 66%                                                        | 1.00  |
| mafft_linsi   | -13351.2          | -13361.6  | -13361.0           | -13351.2                                                | 64%                                                        | 1.00  |
| muscle        | -13417.7          | -13430.3  | -13426.8           | -13416.7                                                | 76%                                                        | 1.00  |
| prank         | -13255.0          | -13265.8  | -13262.3           | -13255.0                                                | 73%                                                        | 1.00  |
| probalign     | -13476.1          | -13487.4  | -13486.1           | -13475.6                                                | 65%                                                        | 1.00  |
| probcons      | -13433.3          | -13445.6  | -13442.7           | -13433.3                                                | 59%                                                        | 1.00  |
| promal_wPDB   | -13512.2          | -13522.4  | -13520.9           | -13512.8                                                | 65%                                                        | 1.00  |
| model = LG    |                   |           |                    |                                                         |                                                            |       |
| dialign       | -13434.8          | -13443.9  | -13444.6           | -13429.3                                                | 54%                                                        | --    |
| kalign        | -13293.4          | -13300.7  | -13300.0           | -13296.8                                                | < 50%                                                      | --    |
| mafft_einsi   | -13279.8          | -13291.0  | -13289.1           | -13279.8                                                | 57%                                                        | --    |
| mafft_ginsi   | -13253.7          | -13261.1  | -13260.3           | -13252.3                                                | 58%                                                        | --    |
| mafft_linsi   | -13279.8          | -13291.0  | -13289.1           | -13279.8                                                | 54%                                                        | --    |
| muscle        | -13355.7          | -13367.2  | -13364.4           | -13356.2                                                | 67%                                                        | --    |
| prank         | -13197.1          | -13205.3  | -13201.3           | -13197.1                                                | 68%                                                        | --    |
| probalign     | -13415.2          | -13425.5  | -13423.6           | -13417.1                                                | 59%                                                        | --    |
| probcons      | -13362.0          | -13370.5  | -13369.1           | -13362.0                                                | < 50%                                                      | --    |
| promal_wPDB   | -13457.0          | -13465.8  | -13464.4           | -13457.0                                                | 58%                                                        | --    |
| model = mixed |                   |           |                    |                                                         |                                                            |       |
| dialign       | -13406.7          | -13417.1  | -13415.2           | -13406.9                                                | 57%                                                        | 1.00  |
| kalign        | -13279.1          | -13286.0  | -13285.2           | -13279.1                                                | 54%                                                        | 0.99  |
| mafft_einsi   | -13272.0          | -13281.6  | -13280.7           | -13272.4                                                | 59%                                                        | 1.00  |
| mafft_ginsi   | -13225.4          | -13235.0  | -13234.0           | -13225.2                                                | 59%                                                        | 1.00  |
| mafft_linsi   | -13272.0          | -13281.6  | -13280.7           | -13272.4                                                | 55%                                                        | 0.99  |
| muscle        | -13339.6          | -13350.9  | -13347.8           | -13340.1                                                | 70%                                                        | 1.00  |
| prank         | -13151.6          | -13162.7  | -13159.1           | -13151.6                                                | 70%                                                        | 0.99  |
| probalign     | -13388.9          | -13399.6  | -13397.1           | -13388.9                                                | 63%                                                        | 1.00  |
| probcons      | -13351.5          | -13357.4  | -13357.5           | -13349.7                                                | 50%                                                        | 0.99  |
| promal_wPDB   | -13428.4          | -13437.9  | -13436.0           | -13428.5                                                | 60%                                                        | 1.00  |

SI Table 3. Results of the sensitivity analysis. Maximum likelihood scores of the best unconstrained tree, and the three competing hypotheses of globin gene family evolution. This second set of analyses included all the vertebrate-specific globins, plus four vertebrate Globin X sequences, four *Ciona* globin sequences, and the six vertebrate neuroglobin sequences as outgroup sequences.

Data: vertebrate-specific globins + Neuroglobin + Globin X + *Ciona* globins

| model = JTT   | Alignment | best tree | Likelihood scores  |                                                         |                        |
|---------------|-----------|-----------|--------------------|---------------------------------------------------------|------------------------|
|               |           |           | 'single co-option' | 'parallel co-option or single co-option/secondary loss' | 'convergent co-option' |
| dialign       | -16406.3  | -16412.3  | -16405.0           | -16402.3                                                |                        |
| kalign        | -16279.1  | -16284.0  | -16281.2           | -16278.6                                                |                        |
| mafft_einsi   | -16253.2  | -16260.3  | -16254.8           | -16254.0                                                |                        |
| mafft_ginsi   | -16221.8  | -16227.5  | -16225.9           | -16221.0                                                |                        |
| mafft_linsi   | -16264.2  | -16268.7  | -16267.4           | -16262.4                                                |                        |
| muscle        | -16521.8  | -16529.8  | -16523.5           | -16521.6                                                |                        |
| prank         | -16143.5  | -16150.7  | -16143.0           | -16142.1                                                |                        |
| probalign     | -16513.6  | -16521.5  | -16516.1           | -16514.5                                                |                        |
| probcons      | -16449.4  | -16453.5  | -16450.6           | -16449.4                                                |                        |
| promal_wPDB   | -16440.8  | -16448.5  | -16442.3           | -16440.8                                                |                        |
|               |           |           |                    |                                                         |                        |
|               |           |           |                    |                                                         |                        |
| model = LG    |           |           |                    |                                                         |                        |
| dialign       | -16349.3  | -16349.9  | -16350.5           | -16342.6                                                |                        |
| kalign        | -16212.4  | -16218.3  | -16208.2           | -16206.9                                                |                        |
| mafft_einsi   | -16178.6  | -16185.1  | -16179.3           | -16178.6                                                |                        |
| mafft_ginsi   | -16146.3  | -16153.1  | -16147.0           | -16146.3                                                |                        |
| mafft_linsi   | -16187.7  | -16194.6  | -16188.3           | -16187.7                                                |                        |
| muscle        | -16462.1  | -16471.0  | -16463.0           | -16462.1                                                |                        |
| prank         | -16069.9  | -16078.5  | -16070.3           | -16069.5                                                |                        |
| probalign     | -16447.7  | -16454.6  | -16448.0           | -16446.7                                                |                        |
| probcons      | -16373.4  | -16377.8  | -16374.1           | -16374.0                                                |                        |
| promal_wPDB   | -16382.0  | -16382.0  | -16378.5           | -16377.6                                                |                        |
|               |           |           |                    |                                                         |                        |
|               |           |           |                    |                                                         |                        |
| model = mixed |           |           |                    |                                                         |                        |
| dialign       | -16304.7  | -16313.8  | -16312.6           | -16305.4                                                |                        |
| kalign        | -16192.1  | -16199.0  | -16193.6           | -16192.1                                                |                        |
| mafft_einsi   | -16151.7  | -16160.6  | -16152.4           | -16151.7                                                |                        |
| mafft_ginsi   | -16113.0  | -16120.3  | -16113.6           | -16113.0                                                |                        |
| mafft_linsi   | -16154.2  | -16160.5  | -16154.9           | -16154.2                                                |                        |
| muscle        | -16425.4  | -16433.6  | -16427.0           | -16425.1                                                |                        |
| prank         | -16028.3  | -16037.2  | -16028.1           | -16028.0                                                |                        |
| probalign     | -16412.6  | -16417.3  | -16412.8           | -16410.9                                                |                        |
| probcons      | -16341.8  | -16348.9  | -16343.4           | -16341.8                                                |                        |
| promal_wPDB   | -16349.0  | -16352.5  | -16347.8           | -16346.9                                                |                        |

SI Fig 1. Previous hypotheses regarding phylogenetic relationships between gnathostome and cyclostome Hbs. According to the traditional view (A), the Hbs of cyclostomes and gnathostomes are orthologous proteins that derive from a proto-Hb precursor protein that had evolved an O<sub>2</sub>-transport function in the vertebrate common ancestor (16). Under the ‘parallel co-option or single co-option/secondary loss’ hypothesis (B), the O<sub>2</sub>-transport function evolved independently in both Hb lineages, or alternatively, an ancestral O<sub>2</sub>-transport function was secondarily lost in the remaining gnathostome-specific globins (17). Finally, under the ‘convergent co-option’ hypothesis (C), O<sub>2</sub>-transport functions evolved independently in the Hbs of cyclostomes and gnathostomes, or alternatively, an ancestral O<sub>2</sub>-transport function was secondarily lost in gnathostome cytoglobin (18).

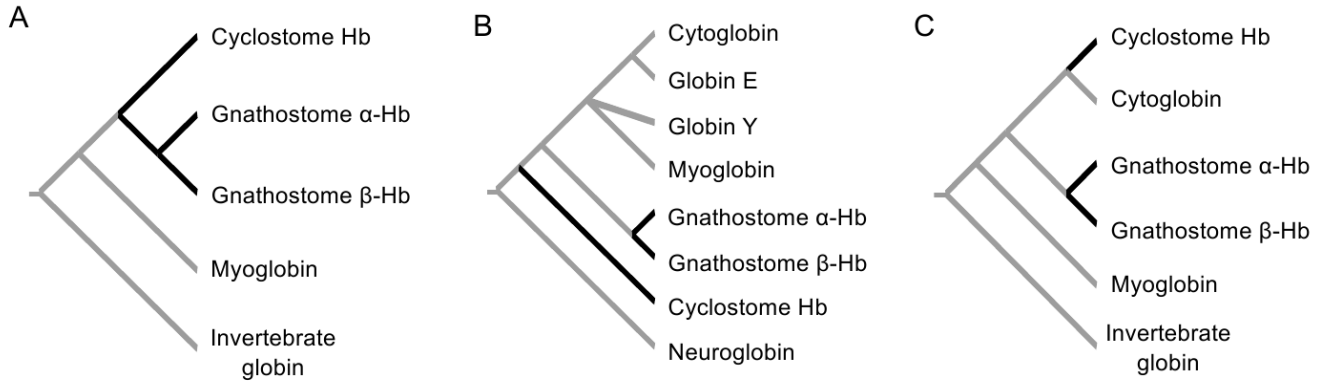

## References

- 1 Ebner B, Burmester T, Hankeln T (2003) Globin genes are present in *Ciona intestinalis*. *Mol Biol Evol* 20:1521-1525.
- 2 Sullivan J, Joyce P (2005) Model Selection in Phylogenetics. *Annu Rev Ecol Evol Syst* 36:445-466.
- 3 Wong KM, Suchard MA, Huelsenbeck JP (2008) Alignment uncertainty and genomic analysis. *Science* 319:473-476.
- 4 Morgenstern B (2004) DIALIGN: multiple DNA and protein sequence alignment at BiBiServ. *Nucleic Acids Res* 32:33-36.
- 5 Lassmann T, Frings O, Sonnhammer ELL (2009) Kalign2: high-performance multiple alignment of protein and nucleotide sequences allowing external features. *Nucleic Acids Res* 37:858-865.
- 6 Katoh K, Toh H (2008) Recent developments in the MAFFT multiple sequence alignment program. *Brief Bioinform* 9:286-298.
- 7 Edgar RC (2004) MUSCLE: multiple sequence alignment with high accuracy and high throughput. *Nucleic Acids Res* 32:1792-1797.
- 8 Löytynoja A, Goldman N (2005) An algorithm for progressive multiple alignment of sequences with insertions. *Proc Natl Acad Sci USA* 102:10557-10562.
- 9 Chikkagoudar S, Roshan U, Livesay D (2007) eProbalign: generation and manipulation of multiple sequence alignments using partition function posterior probabilities. *Nucleic Acids Res* 35:675-677.
- 10 Do CB, Mahabhashyam MSP, Brudno M, Batzoglou S (2005) ProbCons: Probabilistic consistency-based multiple sequence alignment. *Genome Res* 15:330-340.
- 11 Pei J, Tang M, Grishin NV (2008) PROMALS3D web server for accurate multiple protein sequence and structure alignments. *Nucleic Acids Res* 36:30-34.
- 12 Jones DT, Taylor WR, Thornton JM (1992) The rapid generation of mutation data matrices from protein sequences. *Comput Appl Biosci* 8:275-282.
- 13 Le SQ, Gascuel O (2008) An improved general amino acid replacement matrix. *Mol Biol Evol* 25:1307-1320.
- 14 Jobb G, von Haeseler A, Strimmer K (2004) TREEFINDER: a powerful graphical analysis environment for molecular phylogenetics. *BMC Evol Biol* 4:18.
- 15 Ronquist F, Huelsenbeck JP (2003) MrBayes 3: Bayesian phylogenetic inference under mixed models. *Bioinformatics* 19:1572-1574.
- 16 Goodman M, Pedwaydon J, Czelusniak J, Suzuki T, Gotoh T, Moens L, Shishikura F, Walz D, Vinogradov S (1988) An evolutionary tree for invertebrate globin sequences. *J Mol Evol* 27:236-249.
- 17 Burmester T, Hankeln T (2009) What is the function of neuroglobin? *J Exp Biol* 212:1423-1428.
- 18 Katoh K, Miyata T (2002) Cyclostome hemoglobins are possibly paralogous to gnathostome hemoglobins. *J Mol Evol* 55:246-249.
